# Supplementary material for: Variation in the Microbiota Associated with Daphnia magna Across Genotypes, Populations, and Temperature
Source: PubMed Central journal article supplement (PMC7176607; doi:10.1007/s00248-019-01412-9), 2019-08-03

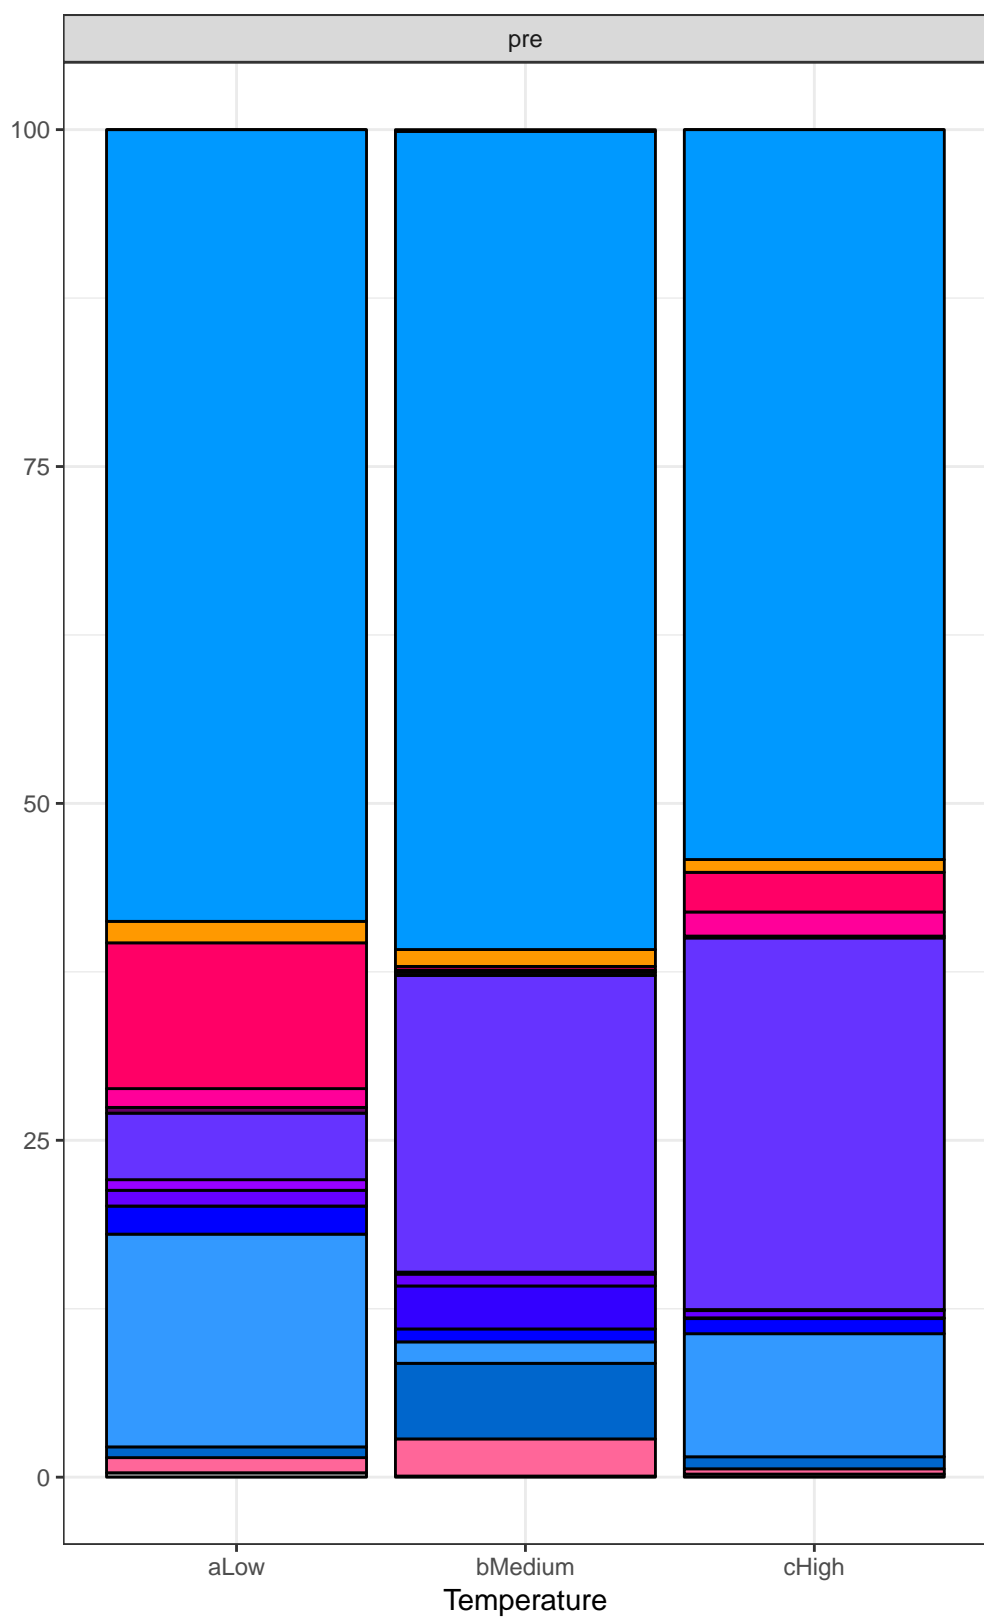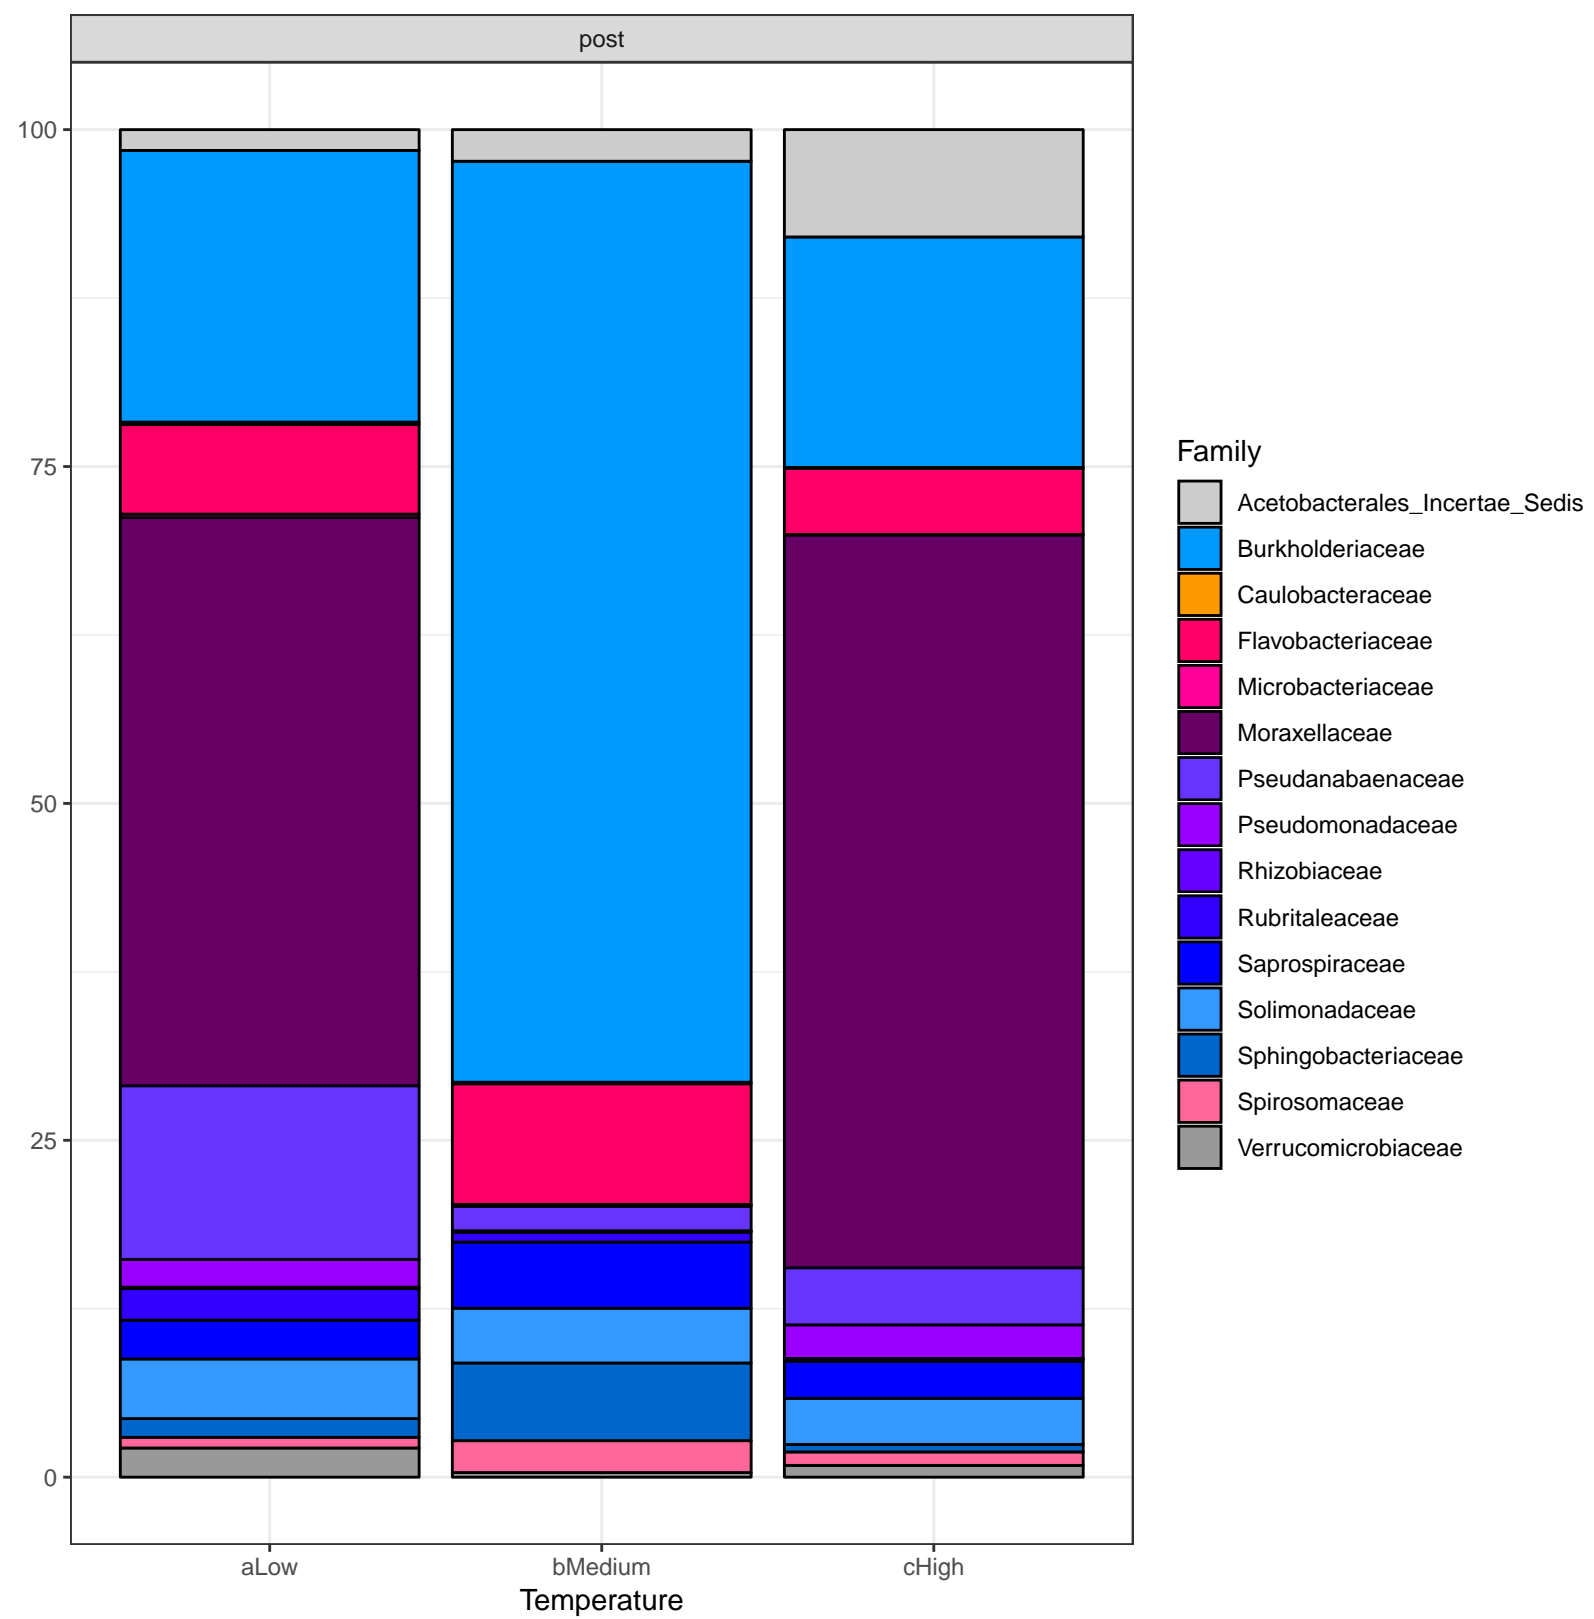

Supplement: 248_2019_1412_MOESM1_ESM.pdf [file 248_2019_1412_MOESM1_ESM.pdf]
